# Supplementary material for: Resistive switching of Sn-doped In2O3/HfO2 core–shell nanowire: geometry architecture engineering for nonvolatile memory
Source: Royal Society of Chemistry journal article supplement (doi:10.1039/c6nr09564j), 2017-01-01
Supplement: c6nr09564j1.pdf [file c6nr09564j1.pdf]

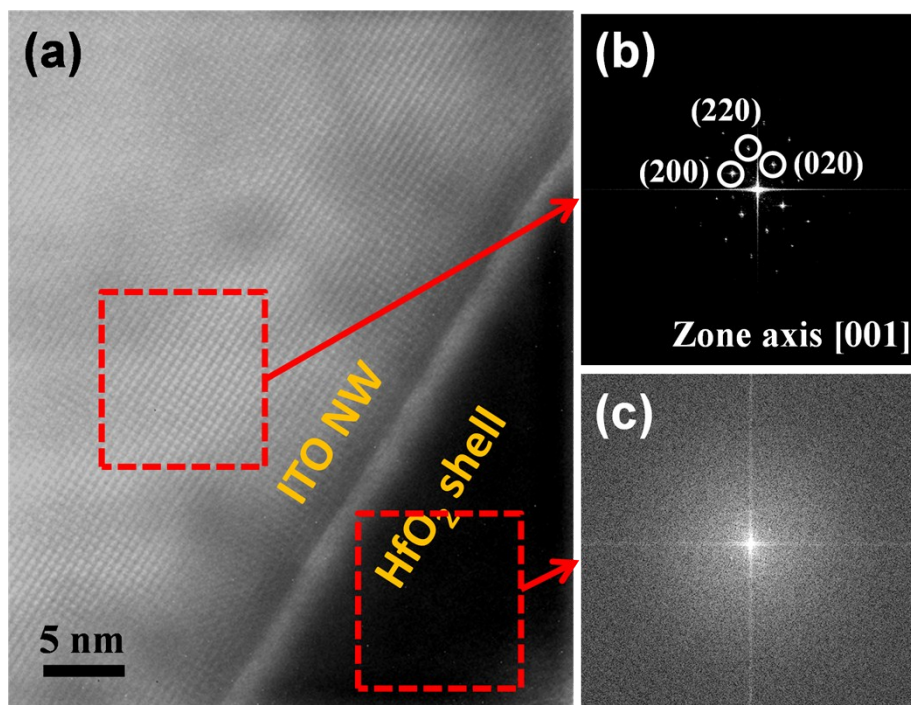

**Figure S2** (a) A high resolution TEM image of the HfO<sub>2</sub>/ITO core-shell nanowire. (b)The corresponding fast Fourier transform image of the ITO NW. (c) The corresponding fast Fourier transform image of the HfO<sub>2</sub> shell.

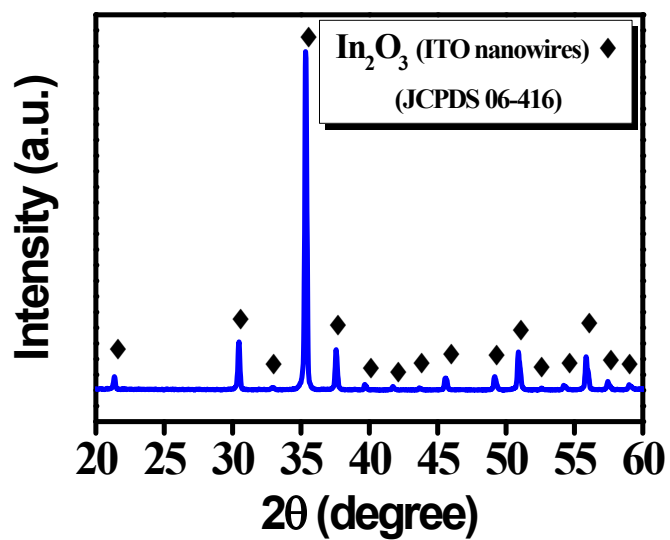

**Figure S3** XRD spectra of ITO/HfO<sub>2</sub> core-shell NWs.

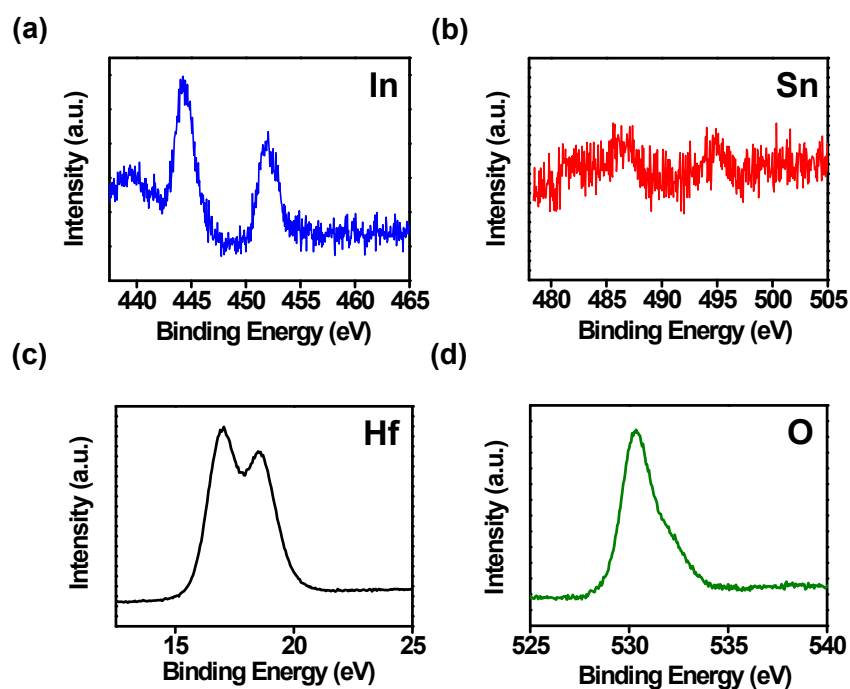

**Figure S4** Chemical components of In, Sn, Hf and O on ITO/HfO<sub>2</sub> core-shell nanowires via XPS analysis.

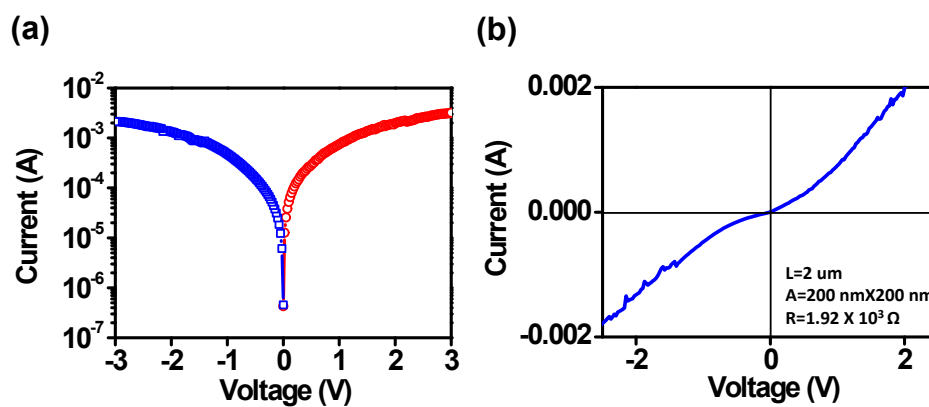

**Figure S5** (a) Typical  $I$ - $V$  characteristics of an ITO NW in semi-log scale. (b) Typical  $I$ - $V$  characteristics of an ITO NW in linear scale.

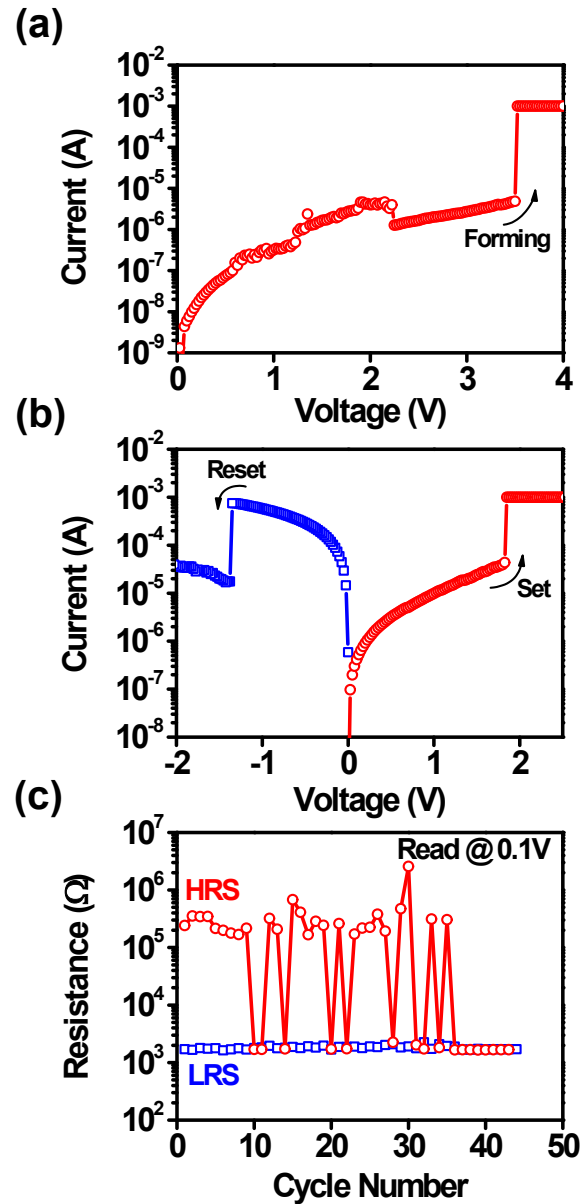

**Figure S6** (a) Typical  $I$ - $V$  characteristics of the Au/Ti/ITO-HfO<sub>2</sub> (10 nm) NW/Ti/Au device operated at the forming process. (b) Typical  $I$ - $V$  characteristics of resistive switching behavior for the Au/Ti/ITO-HfO<sub>2</sub> (10 nm) NW/Ti/Au in semi-log scale. (c) Endurance test of the Au/Ti/ITO-HfO<sub>2</sub> (10 nm) NW/Ti/Au device under the DC switching sweep mode at the read voltage of 0.1 V.
